# Supplementary material
Source: MDPI journal article supplement (https://www.mdpi.com/2073-4433/12/12/1638)
Supplement: s1 [file s1]

Supplementary

# Modeling Biomass Burning Organic Aerosol Atmospheric Evolution and Chemical Aging

David Patoulias<sup>1,2</sup>, Evangelos Kallitsis<sup>3</sup>, Laura Posner<sup>4</sup>, Spyros N. Pandis<sup>1,2</sup>

<sup>1</sup>Department of Chemical Engineering, University of Patras, Patras, Greece

<sup>2</sup>Institute of Chemical Engineering Sciences, Foundation for Research and Technology – Hellas(FORTH/ICE-HT), Patras, Greece

<sup>3</sup>Department of Earth Science and Engineering, Imperial College London, London, SW7 2AZ, United Kingdom

<sup>4</sup>Department of Chemical Engineering, Carnegie Mellon University, Pittsburgh, PA, USA

\* Correspondence: to: Spyros N. Pandis (spyros@chemeng.upatras.gr)

**Table S1.** Vertical model structure.

| Layer number | Bottom height (m) | Top height (m) |
|--------------|-------------------|----------------|
| 1            | 0                 | 55             |
| 2            | 55                | 135            |
| 3            | 135               | 240            |
| 4            | 240               | 370            |
| 5            | 370               | 540            |
| 6            | 540               | 750            |
| 7            | 750               | 1000           |
| 8            | 1000              | 1450           |
| 9            | 1450              | 1900           |
| 10           | 1900              | 2500           |

**Table S2.** Volatility distribution of organic compounds emitted by the fire in the base case.

| $C_i^*$<br>( $\mu\text{g m}^{-3}$ ) | $\xi_i$<br>( $T = 298 \text{ K}$ ) | Concentration                     |                                            |                                       |
|-------------------------------------|------------------------------------|-----------------------------------|--------------------------------------------|---------------------------------------|
|                                     |                                    | Total<br>( $\mu\text{g m}^{-3}$ ) | Particle phase<br>( $\mu\text{g m}^{-3}$ ) | Gas phase<br>( $\mu\text{g m}^{-3}$ ) |
| $10^{-2}$                           | 1                                  | 160                               | 160                                        | 0                                     |
| $10^{-1}$                           | 1                                  | 0                                 | 0                                          | 0                                     |
| 1                                   | 1                                  | 80                                | 80                                         | 0                                     |
| 10                                  | 0.99                               | 80                                | 79                                         | 1                                     |
| $10^2$                              | 0.9                                | 160                               | 142.2                                      | 17.8                                  |
| $10^3$                              | 0.47                               | 80                                | 35.6                                       | 44.4                                  |
| $10^4$                              | 0.08                               | 400                               | 29.7                                       | 370.3                                 |
| $10^5$                              | 0.01                               | 400                               | 3.2                                        | 396.8                                 |
| $10^6$                              | 0                                  | 640                               | 0.5                                        | 639.5                                 |
| Total                               |                                    | 2000                              | 530                                        | 1470                                  |
